# Supplementary material
Source: publisher site journal article supplement (https://www.dovepress.com/article/395053)

Batch No. : AB191122

| Product Name             | Deep Ocean Mineral Concentrate # ALO-300K                                                                           |                         |                         |
|--------------------------|---------------------------------------------------------------------------------------------------------------------|-------------------------|-------------------------|
| Product Description      | Standardized mineral supplement produced using a patented process which concentrates minerals from Deep Ocean Water |                         |                         |
| Packaging                | 2.45kg(PET) /6.0kg(PET) /24.5kg(HDPE)                                                                               |                         |                         |
| Raw Material Source      | Deep Ocean Water ; over 600 m under the Pacific Ocean.                                                              |                         |                         |
| Concentrate Ratio        | Deep Ocean Water/ ALO-300K =270/1                                                                                   |                         |                         |
| Country of Origin        | Taiwan(R.O.C)                                                                                                       |                         |                         |
| Manufacturing Date       | 2019.11.22                                                                                                          | Expiry Date             | 2022.11.21              |
| Parameters               |                                                                                                                     | Specification           | Result                  |
| Physicochemical values   | Appearance                                                                                                          | Light yellow clear      | Light yellow clear      |
|                          | Odor                                                                                                                | Neutral                 | Neutral                 |
|                          | Taste                                                                                                               | Bitter , salty          | Bitter , salty          |
|                          | pH value                                                                                                            | 4.5~6.0                 | 4.8                     |
|                          | Sp. Gravity                                                                                                         | 1.24 ~1.37g/ml          | 1.30 g/ml               |
| Microbiological analysis | Total plate count                                                                                                   | <10 <sup>3</sup> CFU/ml | <10 <sup>3</sup> CFU/ml |
|                          | E. coli                                                                                                             | Negative                | Negative                |
|                          | Coliform bacteria                                                                                                   | Negative                | Negative                |
|                          | Mold & Yeast                                                                                                        | <10 <sup>2</sup> CFU/ml | <10 <sup>2</sup> CFU/ml |
|                          | Staphylococcus Aureus                                                                                               | Negative                | Negative                |
|                          | Salmonella                                                                                                          | Negative                | Negative                |
| Main compositions        | Magnesium (Mg)                                                                                                      | 75,000~85,000ppm        | 75,480ppm               |
|                          | Sodium (Na)                                                                                                         | 1,500~8,000ppm          | 2,164ppm                |
|                          | Potassium (K)                                                                                                       | 1,000~8,000ppm          | 1,771ppm                |
|                          | Calcium (Ca)                                                                                                        | 15~250ppm               | 16ppm                   |

Prepared by : 邱喬雲

Approved by : 宋瑩瑾

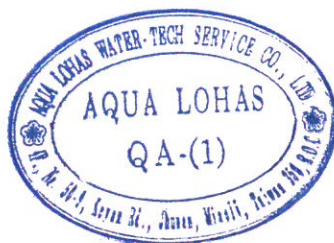

Supplement: Supplementary file 1 [file get_supplementary_file.php]
